# Supplementary material for: Dual concentration-dependent effect of ascorbic acid on PAP(248–286) amyloid formation and SEVI-mediated HIV infection
Source: Royal Society of Chemistry journal article supplement (doi:10.1039/d1cb00084e), 2021-01-01
Supplement: d1cb00084e1.pdf [file d1cb00084e1.pdf]

### Supplementary document

#### **Dual concentration-dependent effect of Ascorbic acid on PAP(248-286) amyloid formation and SEVI-mediated HIV infection**

Satabdee Mohapatra<sup>#1</sup>, Guru KrishnaKumar Viswanathan<sup>#1</sup>, Lukas Wettstein<sup>#2</sup>, Elad Arad<sup>3</sup>, Ashim Paul<sup>1</sup>, Vijay Kumar<sup>1</sup>, Raz Jelinek<sup>3</sup>, Jan Münch<sup>2</sup>, Daniel Segal<sup>\*1</sup>

<sup>1</sup> Shmunis School of Biomedicine and Cancer Research, George S. Wise Faculty of Life Sciences, Tel Aviv University, Tel Aviv 69978, Israel

<sup>2</sup> Institute of Molecular Virology, Ulm University Medical Center, Ulm, 89081, Germany

<sup>3</sup> Department of Chemistry and Ilse Katz Institute for Nanoscale Science and Technology, Ben Gurion University of the Negev, Beer Sheva 8410501, Israel

<sup>#</sup> Equal contribution

<sup>\*</sup> Corresponding author: Prof. Daniel Segal. E-mail – [dsegal@post.tau.ac.il](mailto:dsegal@post.tau.ac.il)

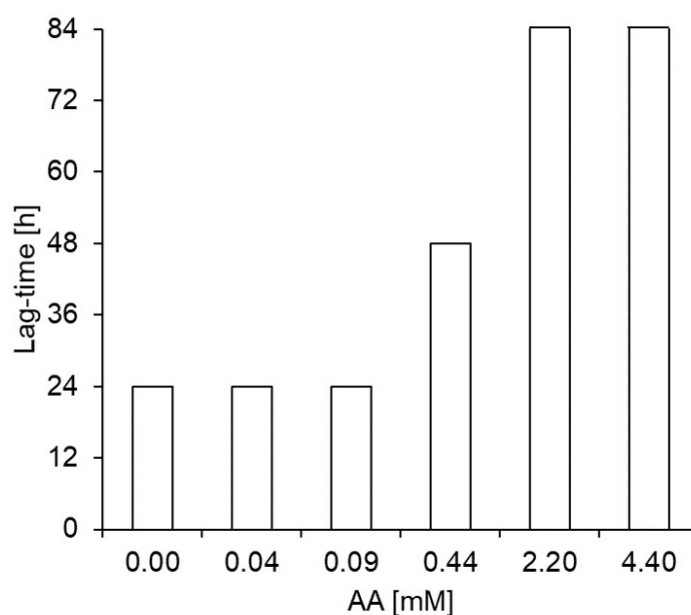

**Supplementary Figure S1.** Plot showing changes in lag-time of PAP(248-286) aggregation with varying concentrations of ascorbic acid.

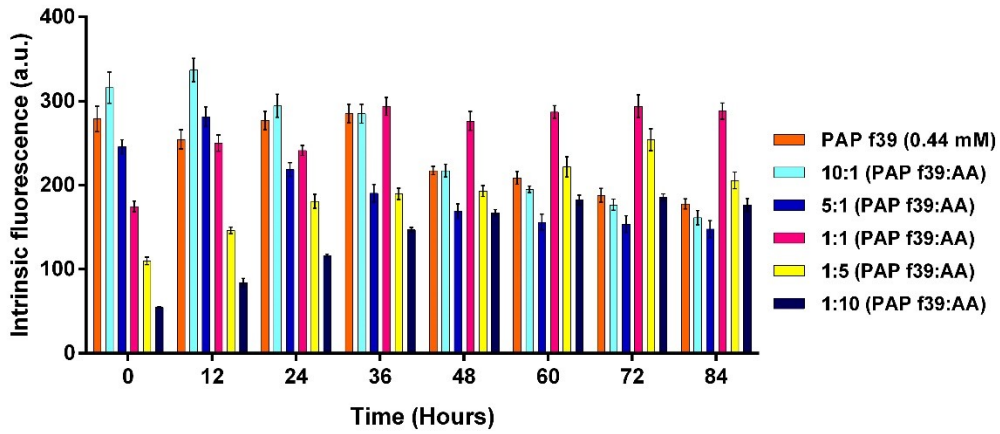

**Supplementary Figure S2.** Intrinsic Tyrosine fluorescence-based aggregation assay showing the effect of various concentrations of ascorbic acid (AA) on PAP(248-286) assembly.

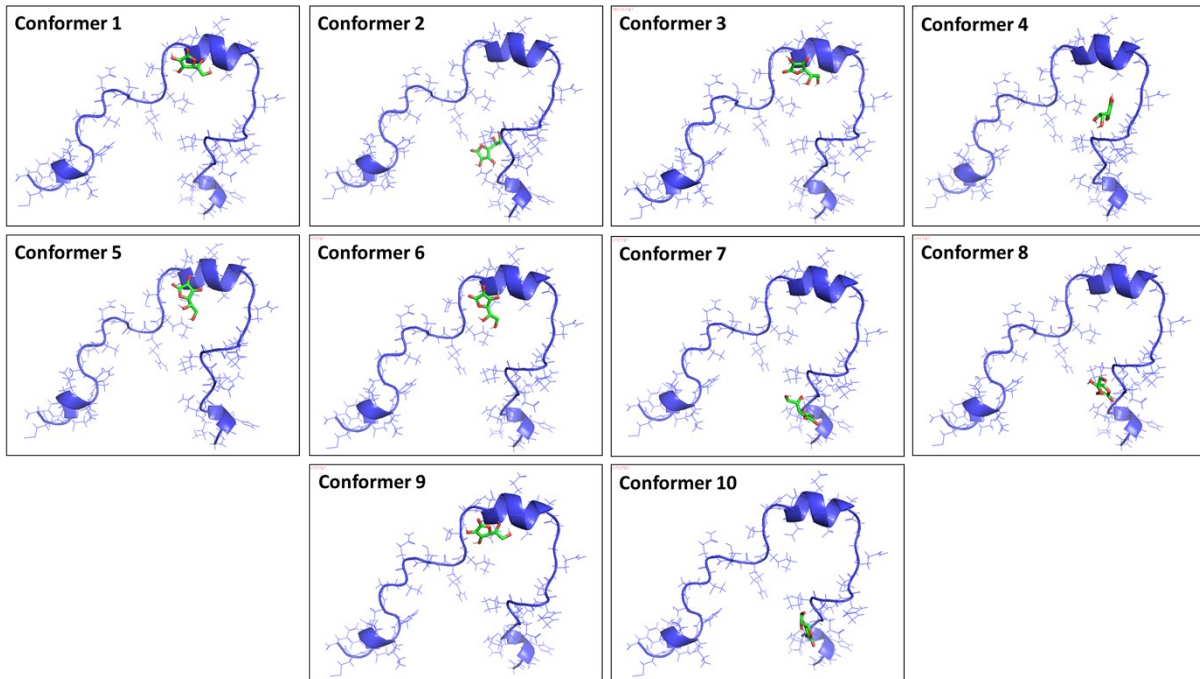

**Supplementary Figure S3.** Docked conformers of monomeric PAP(248-286) peptide with AA.

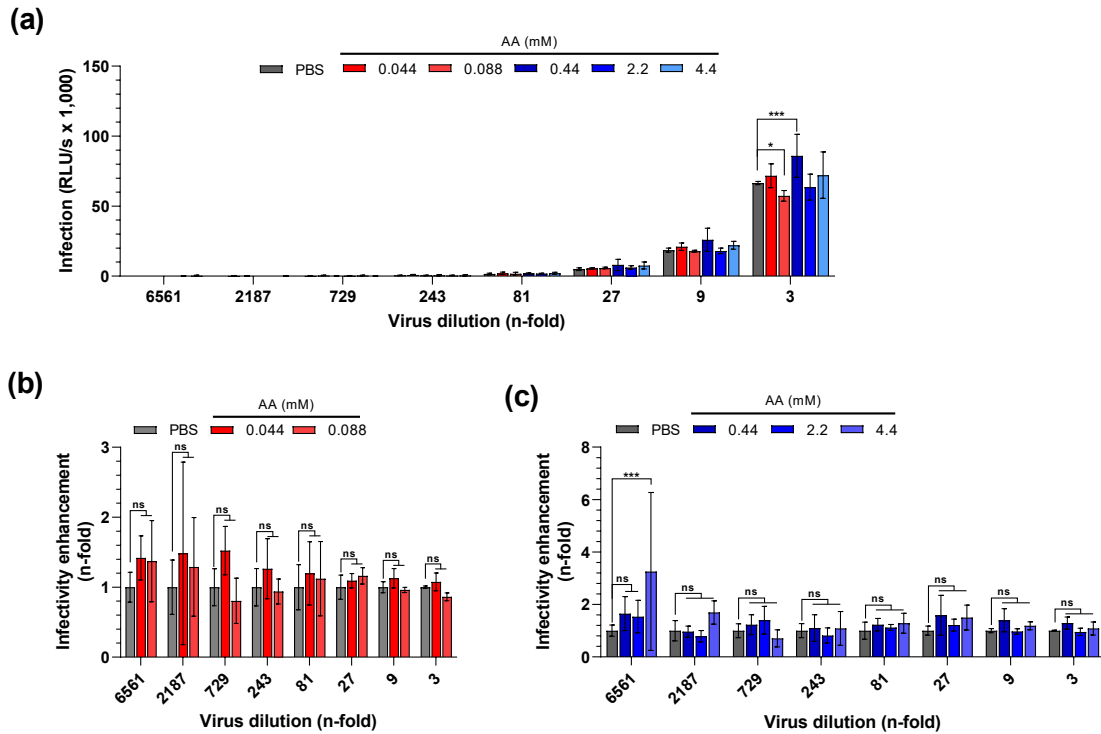

**Supplementary Figure S4.** Effect of ascorbic acid on serially diluted HIV-1 a) Serial dilutions of HIV-1 NL4-3 92TH014.12 were treated with AA of 0; 0.044; 0.088; 0.44; 2.2 and 4.4 mM AA (resulting in matching AA concentrations used in Figure 5) and used to infect TZM-bl cells. Infection rates were assessed by  $\beta$ -galactosidase assay at 3 days post-infection. b) and c) fold change in HIV-1 NL4-3 92TH014.12 infectivity treated matching AA concentrations samples relative to PBS control (calculated from a). Values shown represent mean values derived from triplicate infections in relative light units/s (RLU/s). Asterisks indicate difference of values compared to PBS control, non-significant ns:  $P > 0.05$ , \*:  $P \leq 0.05$ , \*\*:  $P \leq 0.01$ , \*\*\*:  $P \leq 0.001$  (2-way ANOVA with Dunnett's multiple comparisons test), for clarity non-significant differences were omitted in (a).
